# Supplementary material for: Persistent activity during working memory maintenance predicts long-term memory formation in the human hippocampus
Source: PubMed Central journal article supplement — bioRxiv. 2024 Jul 16:2024.07.15.603630. Preprint. [Version 1] doi: 10.1101/2024.07.15.603630 (PMC11275810; doi:10.1101/2024.07.15.603630), 2024-07-16
Supplement: media-1.pdf [file media-1.pdf]

Supplementary information for

## **Persistent activity during working memory maintenance predicts long-term memory formation in the human hippocampus**

Jonathan Daume<sup>1,2,3</sup>, Jan Kamiński<sup>4</sup>, Yousef Salimpour<sup>5</sup>, William S. Anderson<sup>5</sup>, Taufik A. Valiante<sup>6,7,8</sup>, Adam N. Mamelak<sup>1</sup>, Ueli Rutishauser<sup>1,2,3,10</sup>

<sup>1</sup> Department of Neurosurgery, Cedars-Sinai Medical Center, Los Angeles, CA

<sup>2</sup> Department of Neurology, Cedars-Sinai Medical Center, Los Angeles, CA

<sup>3</sup> Center for Neural Science and Medicine, Cedars-Sinai Medical Center, Los Angeles, CA

<sup>4</sup> Center of Excellence for Neural Plasticity and Brain Disorders: BRAINCITY, Nencki Institute of Experimental Biology, Polish Academy of Sciences, Warsaw, Poland

<sup>5</sup> Department of Neurosurgery, Johns Hopkins School of Medicine, Baltimore, MD, United States

<sup>6</sup> Krembil Research Institute, Toronto Ontario, Canada

<sup>7</sup> Division of Neurosurgery, Department of Surgery, University of Toronto, Toronto, Canada

<sup>8</sup> Institute of Biomaterials and Biomedical Engineering | Department of Electrical and Computer Engineering, University of Toronto, Toronto, Canada

<sup>9</sup> Department of Biomedical Engineering, Johns Hopkins School of Medicine, Baltimore, MD, United States

<sup>10</sup> Division of Biology and Biological Engineering, California Institute of Technology, Pasadena, CA

Correspondence: ueli.rutishauser@cshs.org and jonathan.daume@cshs.org

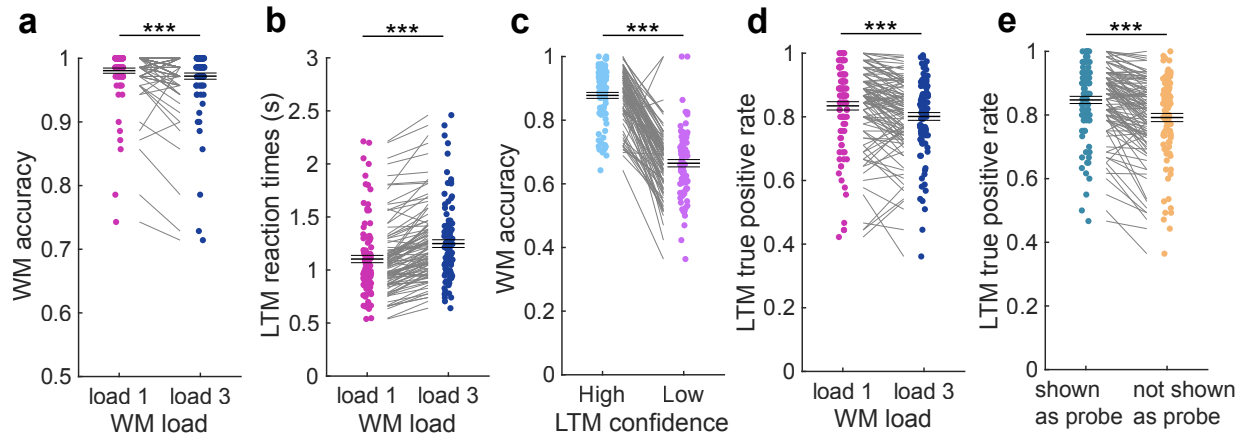

**Figure S1. Behavior results of 100 healthy control participants.** We conducted an online study collecting behavioral data from 100 healthy control participants (age:  $32.9 \pm 10.4$  years; gender (self-reported): 54 females, 46 males). Participants were recruited on the online platform Prolific ([www.prolific.co](http://www.prolific.co)), gave informed consent, and were compensated monetarily for their participation (\$4.50 base pay, bonus pay of \$9.50 if performance above 75% in the WM task and 60% in the LTM task; total of \$15 for approx. 1 hour experiment time; all but one participant received the bonus payment). We pre-selected participants based on age (18-80 years), location (USA), language (fluent English), and a minimum approval rate in previous studies (99%). The experiment was made accessible to participants through the online platform cognition.run ([www.cognition.run](http://www.cognition.run)) and programmed in JsPsych (version: 6.3.1). **(a,b)** In the WM task, participants responded **(a)** with higher accuracy ( $t(99) = 3.54$ ;  $p < 0.0001$ ) and **(b)** faster ( $t(99) = -12.16$ ;  $p < 0.0001$ ) in load 1 as compared to load 3 trials. **(c)** In the LTM task, participants remembered items better when they reported with high than low confidence. ( $t(85) = 18.11$ ,  $p < 0.0001$ ; 14 participants were not using the confidence rating and were therefore excluded from this analysis). **(d)** Pictures presented in load 1 trials in the WM task were better remembered in the subsequent LTM task than pictures presented in load 3 trials ( $t(99) = 5.05$ ;  $p < 0.0001$ ). **(e)** Pictures that were presented as probe images in the WM task were better remembered in the LTM task than pictures that were not used as probe images ( $t(99) = 8.66$ ;  $p < 0.0001$ ).

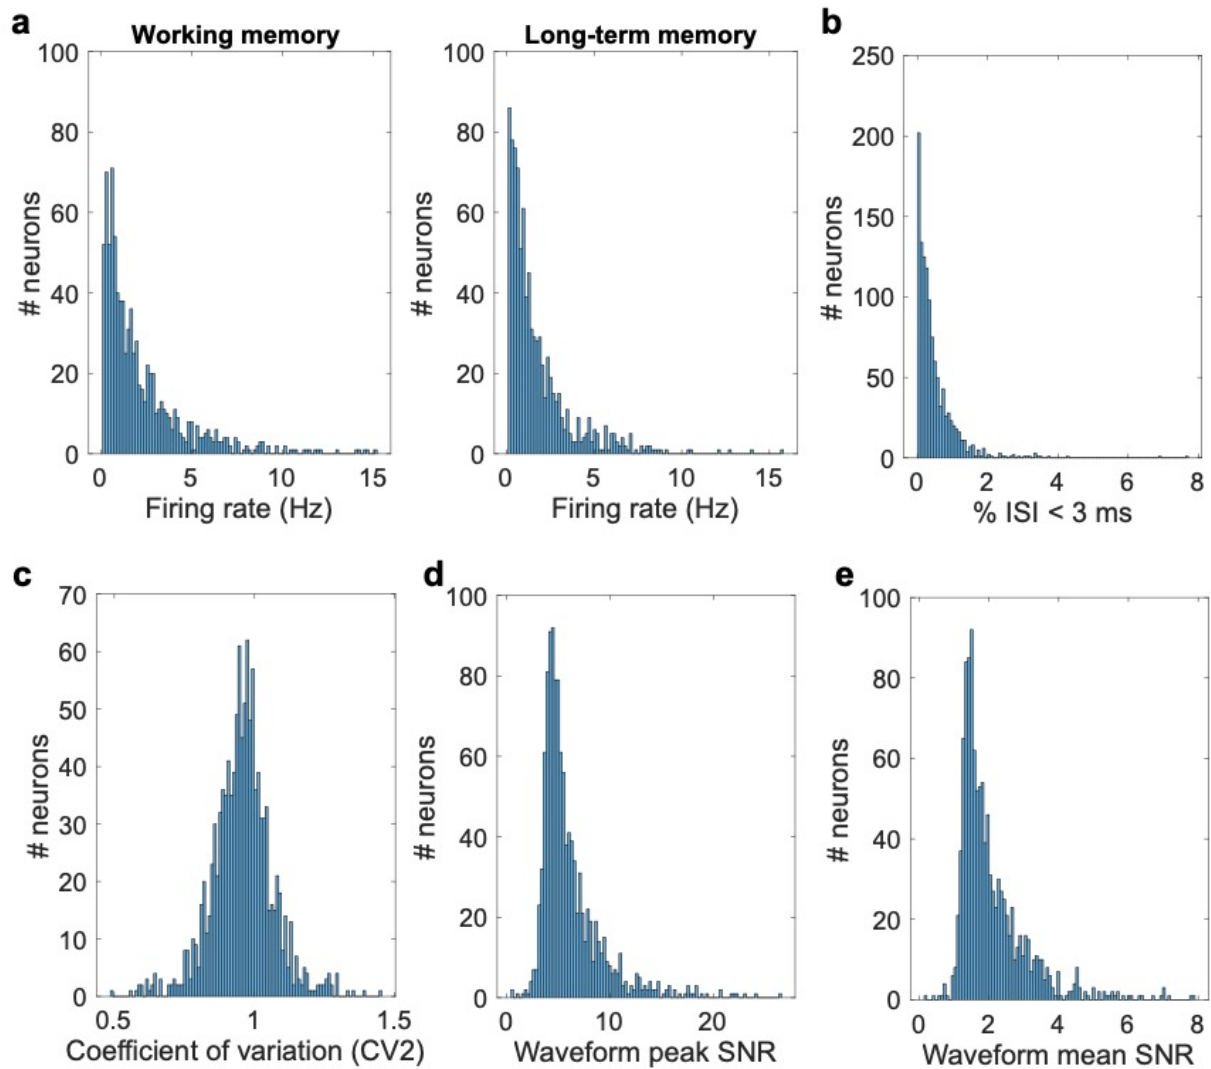

**Figure S2. Spike-sorting quality metrics for all identified putative single units. (a)** Average firing rate separately for the working memory (left) and the long-term memory part (right). **(b)** Proportion of inter-spike intervals (ISI) below 3 ms. **(c)** Coefficient-of-variation. **(d)** Signal-to-noise ratio (SNR) for the peak of the mean waveform across all spikes as compared to the standard deviation of the background noise. **(e)** Mean SNR of the waveform.

| Session | Gender | Age | Acc (%)<br>(WM / LTM) | Seizure onset zone                           | Hippocampus | Amygdala |
|---------|--------|-----|-----------------------|----------------------------------------------|-------------|----------|
| P54cs_2 | f      | 59  | 93.6 / 76.8           | Right mesial temporal                        | 3/0/7       | 5/2/17   |
| P55cs   | f      | 43  | 97.1 / 72.8           | Right mesial temporal                        | 0/0/1       | 7/3/21   |
| P55cs_2 | -      | -   | 97.1 / 74.8           | -                                            | 2/2/8       | 13/1/25  |
| P57cs_2 | m      | 46  | 91.4 / 67.5           | Left neocortical parietal                    | 1/0/4       | 14/5/24  |
| P58cs   | f      | 32  | 97.9 / 86.3           | Right frontal neocortical                    | 0/1/2       | 9/4/27   |
| P61cs   | f      | 52  | 87.1 / 68.8           | Left mesial temporal                         | 6/2/12      | 6/2/11   |
| P61cs_2 | -      | -   | 97.9 / 72.3           | -                                            | 0/0/2       | 7/3/8    |
| P62cs   | f      | 25  | 97.1 / 80.8           | Left mesial temporal                         | 0/2/3       | 5/0/19   |
| P64cs   | f      | 63  | 78.6 / 56.8           | Right lateral temporal<br>neocortical        | 0/0/0       | 3/0/17   |
| P65cs   | f      | 55  | 94.3 / 72             | Bilateral independent<br>temporal            | 5/0/9       | 7/3/18   |
| P67cs   | f      | 38  | 97.9 / 80.8           | Bilateral mesial temporal                    | 0/0/0       | 5/1/12   |
| P68cs   | m      | 54  | 92.1 / 58             | Bilateral mesial temporal                    | 3/3/16      | 1/0/17   |
| P69cs   | f      | 41  | 75 / 64.8             | Not localized                                | 3/2/8       | 4/0/7    |
| P70cs   | f      | 30  | 98.6 / 68.3           | Right temporal                               | 0/0/1       | 5/7/14   |
| P70cs_2 | -      | -   | 96.4 / 73.9           | -                                            | 0/0/1       | 0/0/5    |
| P71cs   | m      | 40  | 96.4 / 69             | Not localized                                | 0/0/0       | 0/0/3    |
| P73cs   | f      | 58  | 92.1 / 60.5           | Left mesial temporal                         | 0/1/5       | 7/1/17   |
| P74cs   | m      | 23  | 97.9 / 73             | Left neocortical temporal                    | 0/0/0       | 6/0/9    |
| P76cs   | f      | 24  | 99.3 / 78.5           | Not localized                                | 4/0/6       | 12/1/25  |
| P76cs_2 | -      | -   | 100 / 90              | -                                            | 0/0/0       | 0/0/4    |
| P77cs   | f      | 46  | 94.3 / 73             | Right auditory cortex                        | 2/2/4       | 12/12/41 |
| P78cs   | f      | 54  | 97.1 / 59.8           | Right anterior temporal                      | 0/1/13      | 0/1/14   |
| P79cs   | f      | 42  | 97.9 / 68.8           | Right anterior lateral<br>temporal neocortex | 6/2/17      | 14/4/28  |
| P79cs_2 | -      | -   | 97.1 / 80.5           | -                                            | 4/0/13      | 9/3/19   |
| P80cs   | o      | 24  | 100 / 82.3            | Not localized                                | 4/7/13      | 20/9/49  |
| P82cs   | m      | 42  | 98.6 / 69.5           | Bitemporal                                   | 11/2/17     | 12/1/24  |
| P87cs*  | f      | 26  | 74.3 / 54             | Not localized                                | 0/0/0       | 0/0/0    |
| P88T    | m      | 26  | 99.3 / 76.3           | Right mesial temporal                        | 3/1/22      | 0/0/6    |
| P89T    | f      | 45  | 97.1 / 57             | Right frontal                                | 7/3/22      | 11/0/18  |
| P90T_2  | m      | 20  | 91.4 / 57.8           | Occipital cortex                             | 0/0/11      | 0/0/2    |
| P90T_3  | -      | -   | 90.7 / 55.8           | -                                            | 0/1/13      | 0/0/0    |
| P93T    | m      | 23  | 83.6 / 62.7           | Left mesial temporal                         | 0/0/4       | 0/0/3    |
| P96T    | f      | 58  | 90 / 65               | Bilateral mesial temporal                    | 4/0/6       | 0/0/5    |
| P101T   | f      | 25  | 100 / 87              | Left neocortical temporal                    | 6/3/16      | 5/0/5    |

|                 |   |    |             |                                                        |        |        |
|-----------------|---|----|-------------|--------------------------------------------------------|--------|--------|
| <b>P101T_2</b>  | - | -  | 100 / 90    | -                                                      | 5/3/8  | 5/3/6  |
| <b>P103T</b>    | m | 49 | 96.4 / 61.5 | Right mesial temporal                                  | 4/2/20 | 3/0/11 |
| <b>P106T</b>    | m | 26 | 84.3 / 58.3 | Multifocal                                             | 1/0/7  | 6/1/14 |
| <b>P109T</b>    | m | 28 | 100 / 85.8  | Multifocal                                             | 1/2/15 | 0/0/7  |
| <b>P110T</b>    | m | 38 | 99.3 / 64.3 | Right fusiform cortex                                  | 0/0/6  | 1/0/10 |
| <b>P113T_2</b>  | m | 36 | 97.1 / 60.8 | Right mesial temporal                                  | 2/2/11 | 1/1/7  |
| <b>P116T</b>    | m | 28 | 97.9 / 65   | Left amygdala                                          | 4/1/9  | 5/0/18 |
| <b>P1802jh</b>  | m | 62 | 90.7 / 70.3 | Right mesial temporal                                  | 5/1/12 | 0/0/0  |
| <b>P1809jh</b>  | m | 45 | 75.7 / 57   | Left inferior + middle frontal gyrus                   | 0/1/6  | 0/0/0  |
| <b>P1811jh</b>  | f | 27 | 76.4 / 61   | Bilateral mesial temporal                              | 1/0/10 | 0/0/0  |
| <b>P1814jh</b>  | m | 48 | 90.7 / 76.8 | Left inferior orbitofrontal cortex and mesial temporal | 1/3/8  | 0/0/0  |
| <b>P1901jh*</b> | m | 55 | 45 / 74.8   | Left mesial temporal                                   | 0/0/0  | 0/0/0  |
| <b>P1903jh</b>  | m | 30 | 99.3 / 82   | Right mesial temporal                                  | 0/0/2  | 0/0/0  |
| <b>P1912jh</b>  | m | 49 | 70.7 / 60.5 | Left insula and left mesial temporal                   | 6/3/16 | 0/0/0  |

**Table S1. Patient demographics and neuron count per area.** For each area, the first number represents the category-selective neuron count, the second the memory-selective neuron count, and the third all recorded neurons. For sessions in which a patient performed lower than 55% in either of the two tasks, the neurons counts were set to zero (marked with \*). These sessions were excluded from all analyses.
